# Supplementary material for: WOx nanoparticles coupled with nitrogen-doped porous carbon toward electrocatalytic N2 reduction
Source: Royal Society of Chemistry journal article supplement (doi:10.1039/d3nr01019h), 2023-01-01
Supplement: d3nr01019h1.pdf [file d3nr01019h1.pdf]

## ***Supporting Information***

### **WO<sub>x</sub> Nanoparticles Coupled with Nitrogen-doped Porous Carbon toward Electrocatalytic N<sub>2</sub>**

#### **Reduction**

Zhaobing Lu<sup>a</sup>, Hui Wang<sup>b</sup>, Yinghao Tao<sup>b</sup>, Sheng Zhu<sup>a\*</sup>, Weiju Hao<sup>b</sup>, Xinjuan Liu<sup>b\*</sup>, Yulin Min<sup>a</sup>, and  
Jinchen Fan<sup>a, b\*</sup>

<sup>a</sup> Shanghai Key Laboratory of Materials Protection and Advanced Materials in Electric Power, College of Environmental and Chemical Engineering, Shanghai University of Electric Power, Shanghai, China

<sup>b</sup> School of Materials and Chemistry, University of Shanghai for Science and Technology, Shanghai, 200093, China

\* E-mails: zhusheng@shiep.edu.cn (S. Z.); xjliu@usst.edu.cn (X. L.); jcfan@usst.edu.cn (J. F.)

## 1. Experimental Section.

### 1.1 Indole blue spectrophotometric method for determining the yield of NH<sub>3</sub>.

The concentration of synthesized ammonia via the electrocatalytic NRR was determined by the indophenol blue method.<sup>1</sup> In the indophenol blue method, 4 mL of electrolyte was removed from the electrochemical reaction vessel after the electrolysis process and added into 50 μL of oxidant (NaClO + NaOH), 500 μL of colorant (C<sub>7</sub>H<sub>5</sub>O<sub>3</sub>Na + NaOH), and 100 μL of catalyst (Na<sub>2</sub>[Fe (CN)<sub>5</sub>NO]·2H<sub>2</sub>O). After standing in darkness for 2 h at room temperature, the absorption spectrum was measured using a UV–vis spectrophotometer. The formation of indophenol blue was determined using the absorbance at a wavelength of 698 nm. The concentration–absorbance curves were calibrated using standard solutions: 0.1 M Na<sub>2</sub>SO<sub>4</sub> electrolyte with a series of concentrations of NH<sub>4</sub>Cl. The standard curve was plotted with the absorbance values at a wavelength of 698 nm as the y axis and the concentration of NH<sub>3</sub> as the x axis. The obtained standard curve ( $y = 0.09143x - 0.00243$ ,  $R^2 = 0.999$ ) shows a good linear relationship of the absorbance value with NH<sub>3</sub> concentration.

The yield of NH<sub>3</sub> could be calculated according to the Equation 1,

$$R(\text{NH}_3) (\text{mg h}^{-1} \text{mg}^{-1}) = \frac{C(\text{NH}_4^+ - \text{N})(\mu\text{g mL}^{-1}) \times V(\text{mL}) \times 17}{t(\text{h}) \times m(\text{mg}) \times 14}, \text{ (Equation 1)}$$

$R(\text{NH}_3)$  is the yield of NH<sub>3</sub> (mg h<sup>-1</sup> mg<sup>-1</sup>).

$V$  is the total volume of electrolyte solution for NRR reaction.

$C_{\text{NH}_4^+ - \text{N}}$  is 14 (g mol<sup>-1</sup>).

$t$  is reaction time (h).

17 is the molar mass value of NH<sub>3</sub>.

$m$  is the load of catalyst on the working electrode (mg).

### 1.2 Determination of FE.

The faradaic efficiency (FE) was determined using the following Equation 2.

$$\text{FE}(\text{NH}_3) (\%) = \frac{3 \times n(\text{NH}_3)(\text{mol}) \times F}{Q} \times 100\%, \text{ (Equation 2)}$$

$\text{FE}$  is Faraday efficiency.

$F$  is Faraday constant (96485.34).

$Q$  is the total electric charge during NRR reaction.

### 1.3 Watt and Chrisp method for determining the concentration of hydrazine.

The content of hydrazine (N<sub>2</sub>H<sub>4</sub>) in the electrolyte was measured by the method of Watt and Chrisp.<sup>2</sup> The hydrazine color reagent was prepared by dissolving 5.99 g of p-dimethylaminobenzaldehyde (p-C<sub>9</sub>H<sub>11</sub>NO) in

the mixture of 30 mL of concentrated HCl and 300 mL of ethanol. Three milliliters of the above prepared color reagent were added into 5 mL of electrolyte and then was stirred for 10 min at room temperature in darkness. The absorbance of hydrazine in the resulting electrolyte was estimated at 460 nm. After that, the UV-Vis absorption curve for the above mixture solution was recorded. The concentration of  $N_2H_4(x)$  were calculated from the absorbance (y) at the maximum absorption wavelength of  $\lambda_{max}=455$  nm according to the Lambert-Beer law.<sup>3</sup> The concentration-absorbance curve was calibrated by using standard ammonia solutions at a series of concentrations, and the fitting curve is  $y = 0.020936x - 0.00168$ , ( $R^2 = 0.9999$ ).

#### 1.4 Preparation of working electrode

1 mg catalyst were dispersed in 900  $\mu$ L of ethanol and 100  $\mu$ L of Nafion solution to form a homogeneous catalyst ink under sonication for 30 min. Then, 100  $\mu$ L of catalyst ink were dropped evenly on carbon paper for catalytic area ( $1 \times 1$  cm<sup>2</sup>), and dried at room temperature.<sup>4</sup>

#### 1.5 <sup>15</sup>N isotope labeling experiment

The <sup>15</sup>N<sub>2</sub> isotope labeled experiment was carried out using the <sup>15</sup>N<sub>2</sub> isotope as the feeding gas to determine the N source of ammonia.<sup>5</sup> Before electrolysis, ultrahigh-purity Ar (99.999%) was purged for 30 min to remove O<sub>2</sub> and N<sub>2</sub>. Then <sup>15</sup>N<sub>2</sub> was prepurified by flowing through 0.05 M H<sub>2</sub>SO<sub>4</sub> solution to remove N contamination and purged for 30 min to saturate the electrolyte. After electrolysis at -0.75 V (vs. RHE) for 2 h in 0.1 M Na<sub>2</sub>SO<sub>4</sub> solutions, the resulting electrolyte was concentrated by heating at 80 °C. The analysis of <sup>15</sup>NH<sub>3</sub> product was conducted by the <sup>1</sup>H NMR with d<sup>6</sup>-DMSO.

#### 1.6 Density functional theory (DFT) calculation details

All theoretical calculations were performed using the density functional theory (DFT), as implemented in the Material Studio Dmol3. The electron exchange and correlation energy functions were treated using the generalized gradient approximation, as captured using the Perdew-Burke-Ernzerh functional (GGA-PBE). Iterative solutions of the Kohn-Sham equations were done using a plane-wave basis set defined using a kinetic energy cutoff of 500 eV.<sup>6</sup> The k-point sampling was obtained from the Monkhorst-Pack scheme with a ( $1 \times 1 \times 1$ ) mesh. The convergence criteria for the electronic self-consistent iteration and force were set to  $1 \times 10^{-5}$  eV and  $0.001 \text{ eV} \cdot \text{\AA}^{-1}$ , respectively. Van der Waals's force was corrected by DFT-D3.

The catalytic activities of the WO<sub>x</sub>/NPC and the WO<sub>2</sub> (011) surface were evaluated by the Gibbs free energy calculations. In the standard computational hydrogen electrode model, the Gibbs free energy change of an elementary step along a reaction pathway can be written as  $\Delta G = \Delta E + \Delta E_{ZPE} - T\Delta S + \Delta G_U + \Delta G_{pH}$ .  $\Delta E$  is the reaction energy between the products and the reactants of the elementary step, which is corrected by the change in the zero-point energy ( $\Delta E_{ZPE}$ ) and the vibrational entropy ( $\Delta S$ ) at  $T=298.15$  K.  $\Delta G_U = eU$  is the Gibbs free

energy correction from the applied electrode potential  $\Phi$ , only for the elementary step involving electron-proton coupling/de-coupling.<sup>7</sup> These values of each adsorbed state were obtained from DFT calculation, whereas that of gas molecules were from standard tables (see Table S3)  $\Delta G_{\text{pH}} = k_B T \times \text{pH} \times \ln 10 = 0.059 \times \text{pH}$  is the correction from pH which is set to 0 under the standard condition. The potential-determining step (PDS) along a reaction pathway is the one having the largest  $\Delta G$  ( $\Delta G_{\text{max}}$ ) and the limiting potential is calculated as  $U_{\text{limiting}} = -\Delta G_{\text{max}}/e$ . It should be noted that the NRR active sites of the  $\text{WO}_2$  (011) surface were identified by iteratively testing all surface sites.<sup>8</sup>

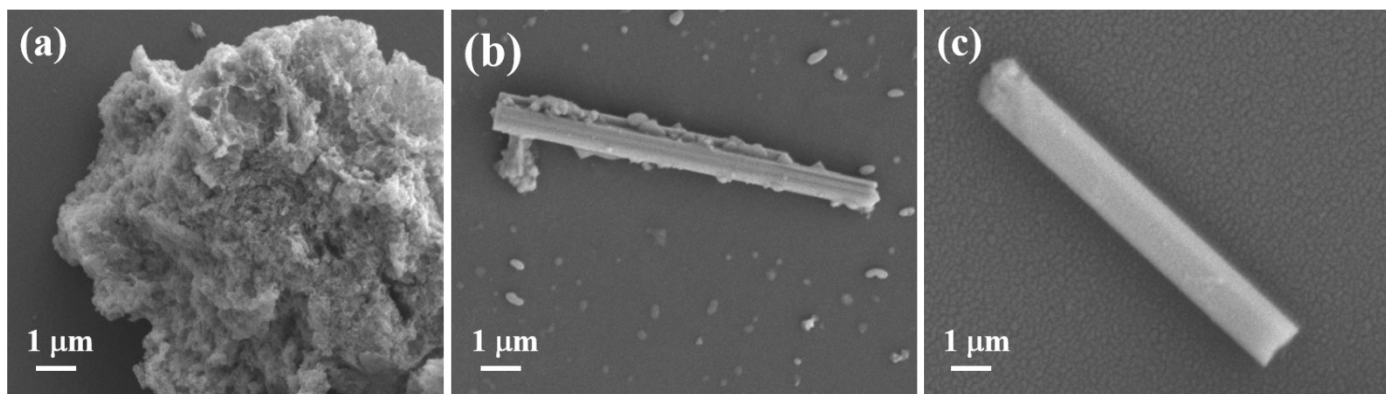

**Figure S1.** Scanning electron microscopy (SEM) images of (a)  $\text{WO}_x/\text{NPC}$ -700 °C, (b)  $\text{WO}_x/\text{NPC}$ -800 °C and (c)  $\text{WO}_x/\text{NPC}$ -900 °C.

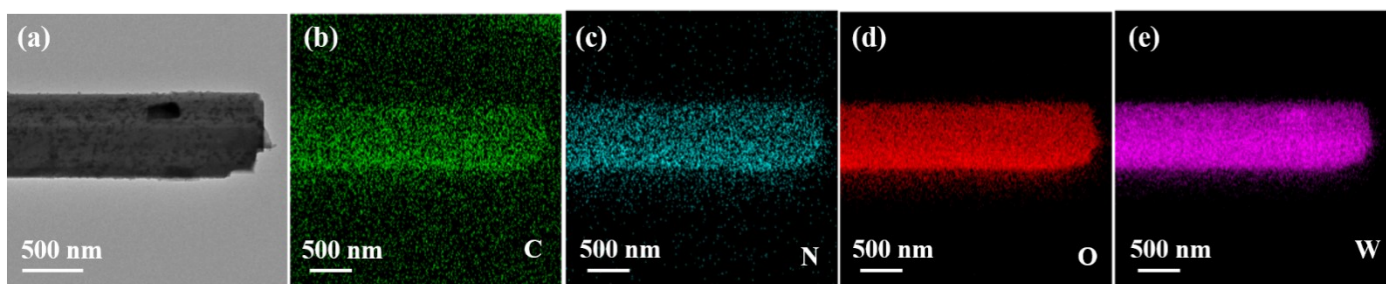

**Figure S2.** SEM image of (a)  $\text{WO}_x/\text{NPC}$ -900 °C, (b-c) corresponding elemental mapping images of  $\text{WO}_x/\text{NPC}$ -900 °C.

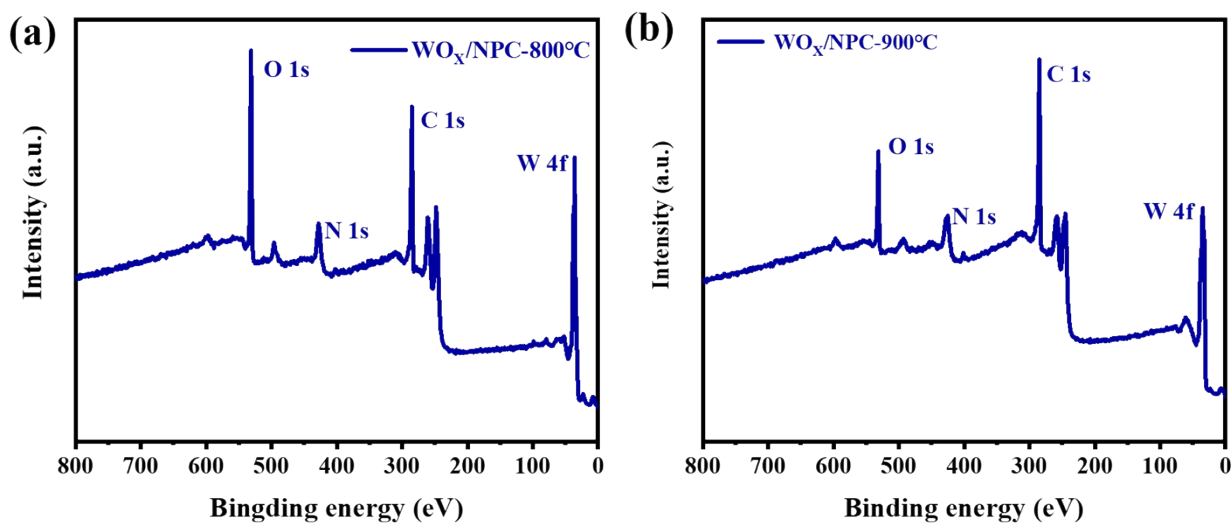

**Figure S3.** X-ray photoelectron spectroscopy (XPS) survey spectra of (a)  $\text{WO}_x/\text{NPC-800 } ^\circ\text{C}$  and (b)  $\text{WO}_x/\text{NPC-900 } ^\circ\text{C}$ .

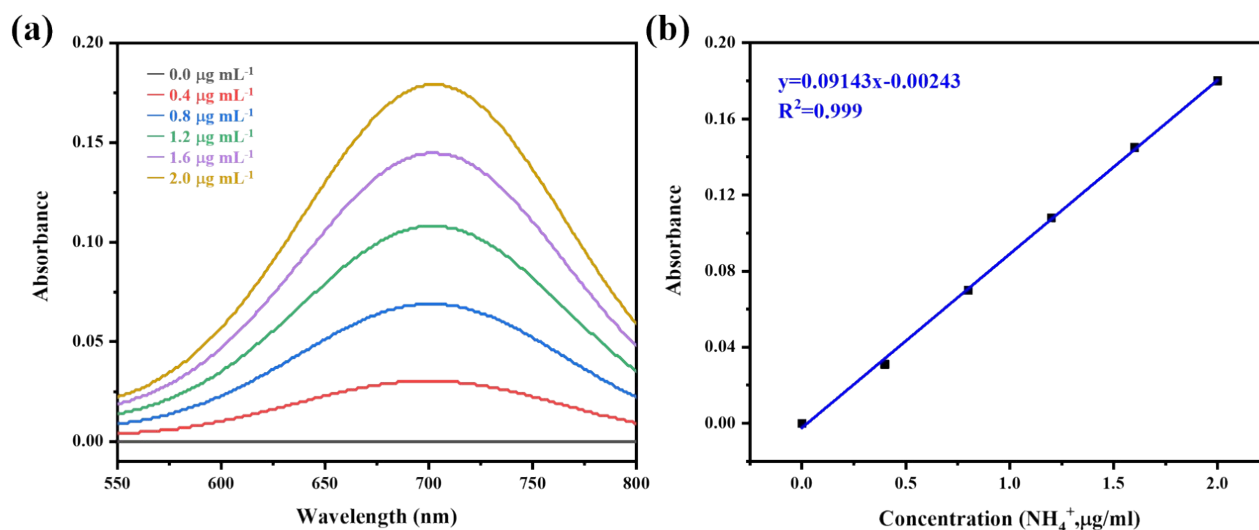

**Figure S4.** Calibration curve of the indophenol blue method in 0.10 M  $\text{Na}_2\text{SO}_4$  using  $\text{NH}_4\text{Cl}$  solutions with specific concentration as standards. (a) UV-vis curves of indophenol assays with different concentrations of  $\text{NH}_3$  after incubated for 2 hours and (b) calibration curve used for determining  $\text{NH}_3$  concentration. The absorbance at 698 nm was measured by a UV-vis spectrophotometer, and the fitting curve shows good linear correlation of absorbance with  $\text{NH}_3$  concentration ( $y=0.01943x-0.00243$ ,  $R^2=0.999$ ).

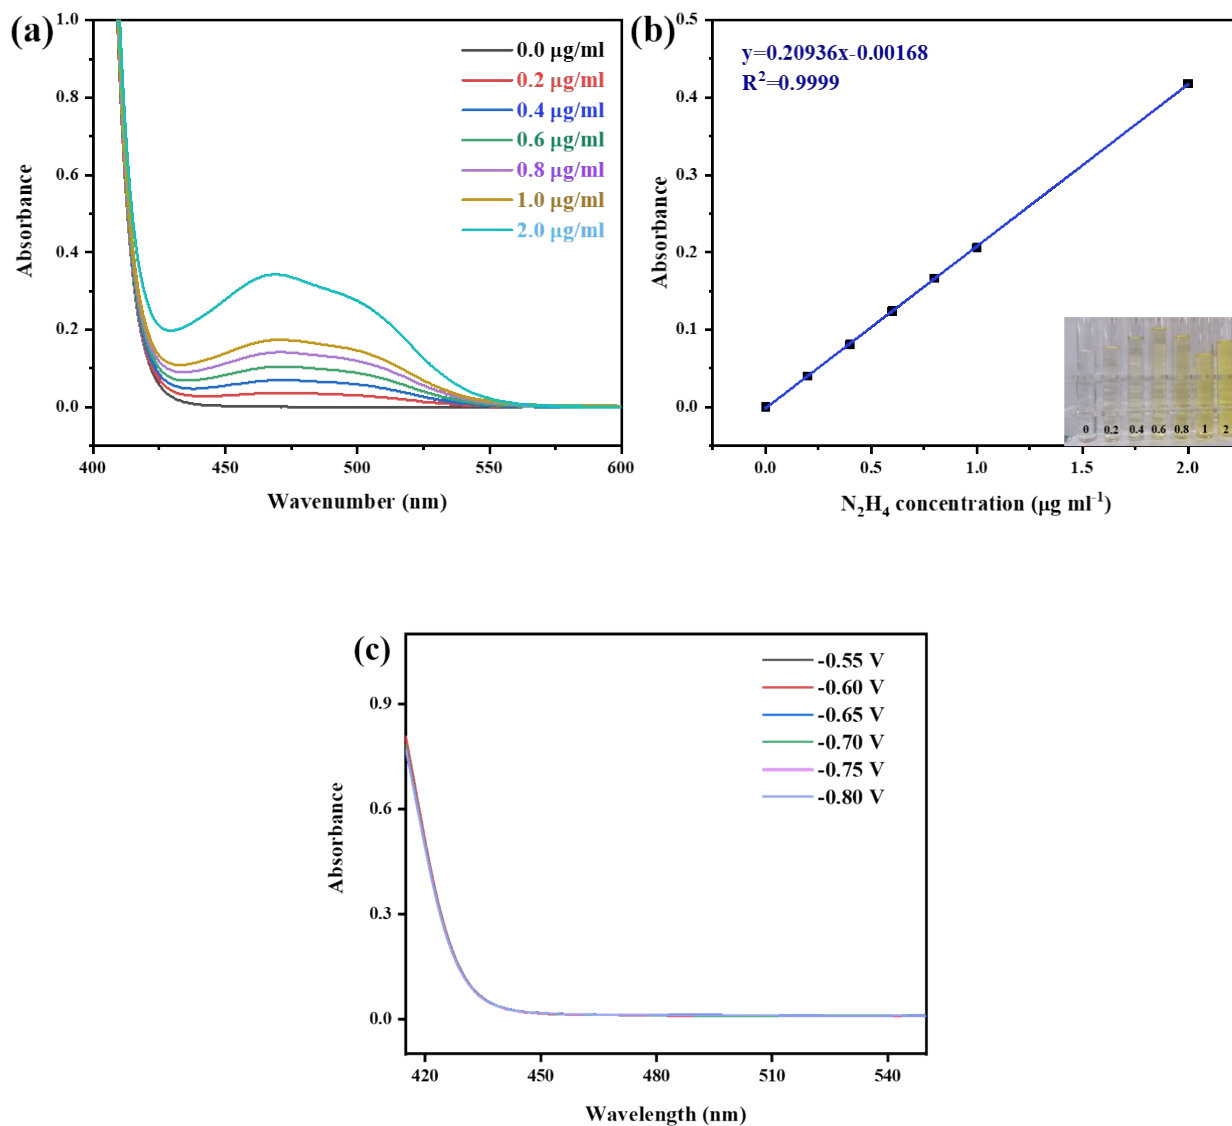

**Figure S5.** Calibration for  $N_2H_4$  detection using the Watt and Chrisp method. (a) UV-vis curves of different concentrations of  $N_2H_4$  stained with the color indicator and incubated for 10 min and (b) calibration curve used for estimation of  $N_2H_4$  concentration. The absorbance at 455 nm was measured by a UV-vis spectrophotometer, and the fitting curve shows good linear correlation of absorbance with  $N_2H_4$  concentration. ( $y = 0.020936x - 0.00168$ ,  $R^2 = 0.9999$ ). (c) UV-vis absorption spectra of the electrolytes stained with  $N_2H_4$  color indicator after electrocatalytic NRR on  $WO_x/NPC-700$  °C catalyst at different potentials.

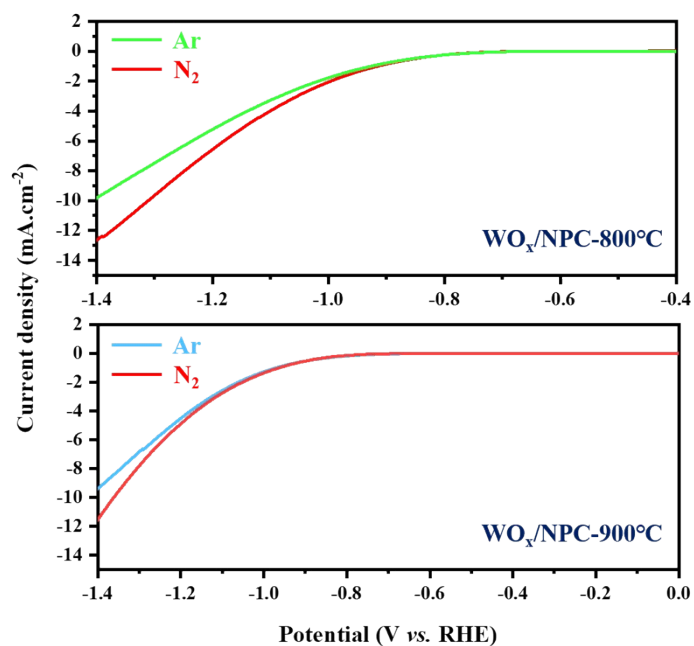

**Figure S6.** Linear sweep voltammetry (LSV) curves of  $\text{WO}_x/\text{NPC-800}^\circ\text{C}$  and  $\text{WO}_x/\text{NPC-900}^\circ\text{C}$  in  $\text{N}_2$  and Ar saturated 0.10 M  $\text{Na}_2\text{SO}_4$  electrolyte.

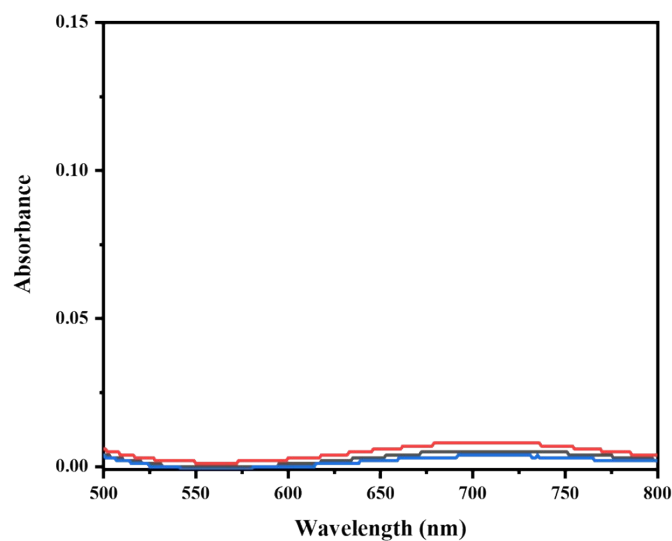

**Figure S7.** The UV-Vis absorption curves of the  $\text{WO}_x/\text{NPC-700}^\circ\text{C}$  under different conditions (red line: blank  $\text{N}_2$ -saturated 0.1M  $\text{Na}_2\text{SO}_4$  electrolyte, black line: electrolysis in Ar-saturated 0.1M  $\text{Na}_2\text{SO}_4$  electrolyte, and blue line: react under open circuit).



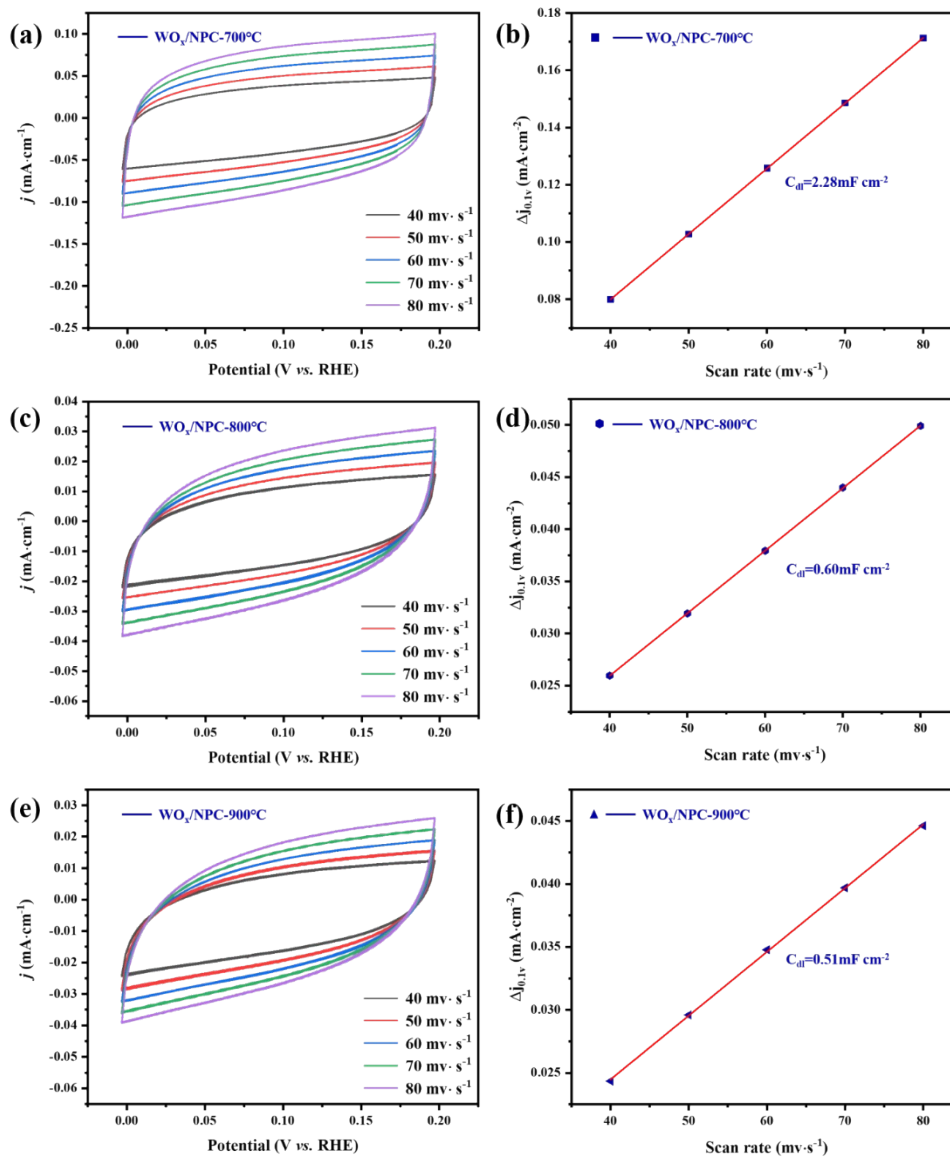

**Figure S8.** Electrochemical double-layer capacitance measurements: CV curves of (a) WO<sub>x</sub>/NPC-700 °C (c)WO<sub>x</sub>/NPC-800 °C, (e) WO<sub>x</sub>/NPC-900 °C catalysts from 40mV to 80mV with different scan rates. (b) (d) (e)The corresponding linear fitting of the current density versus scan rates.

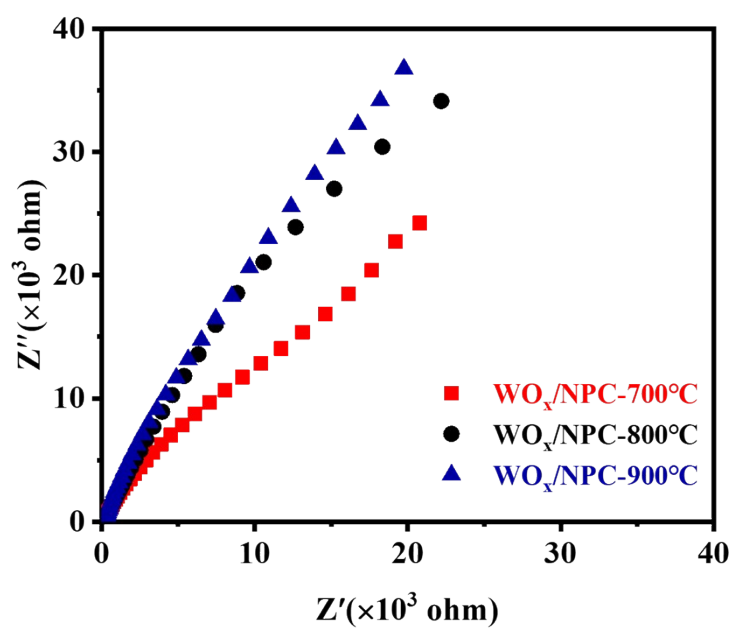

**Figure S9.** Electrochemical impedance spectroscopy (EIS) plots of the  $\text{WO}_x/\text{NPC-700}^\circ\text{C}$ ,  $\text{WO}_x/\text{NPC-800}^\circ\text{C}$  and  $\text{WO}_x/\text{NPC-900}^\circ\text{C}$ .

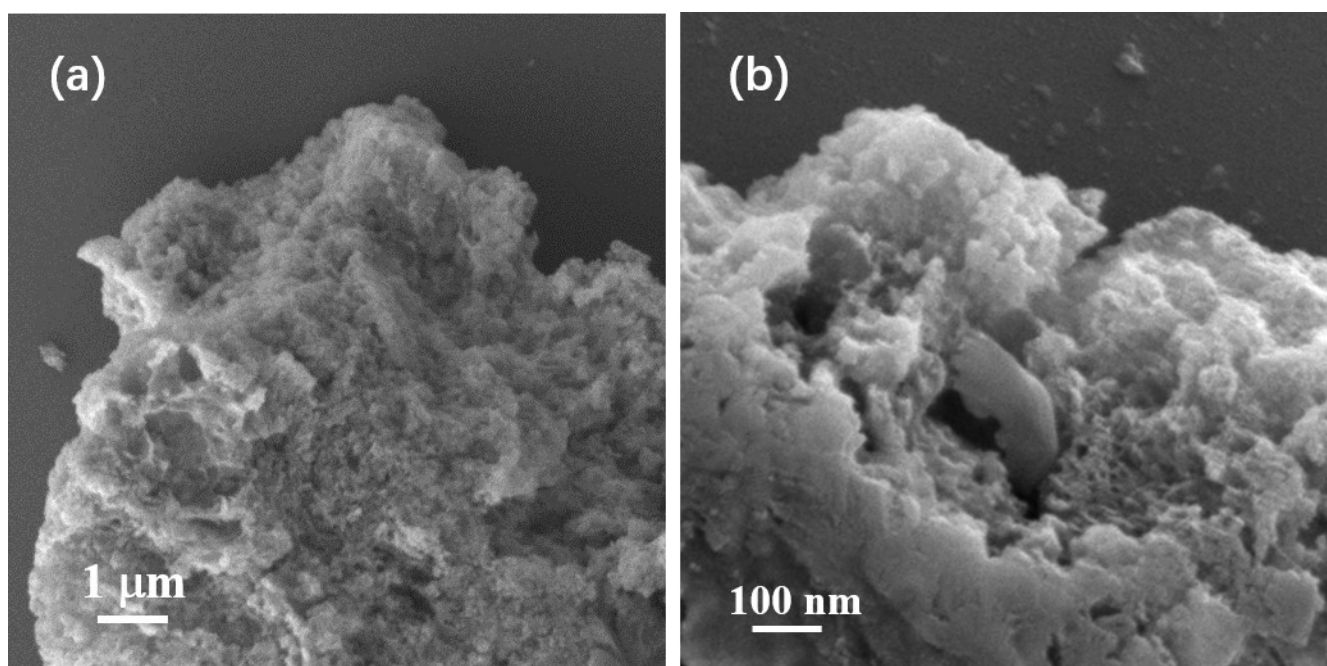

**Figure S10.** SEM images for the  $\text{WO}_x/\text{NPC-700}^\circ\text{C}$  electrocatalyst (a) before and (b) after the eNRR test.

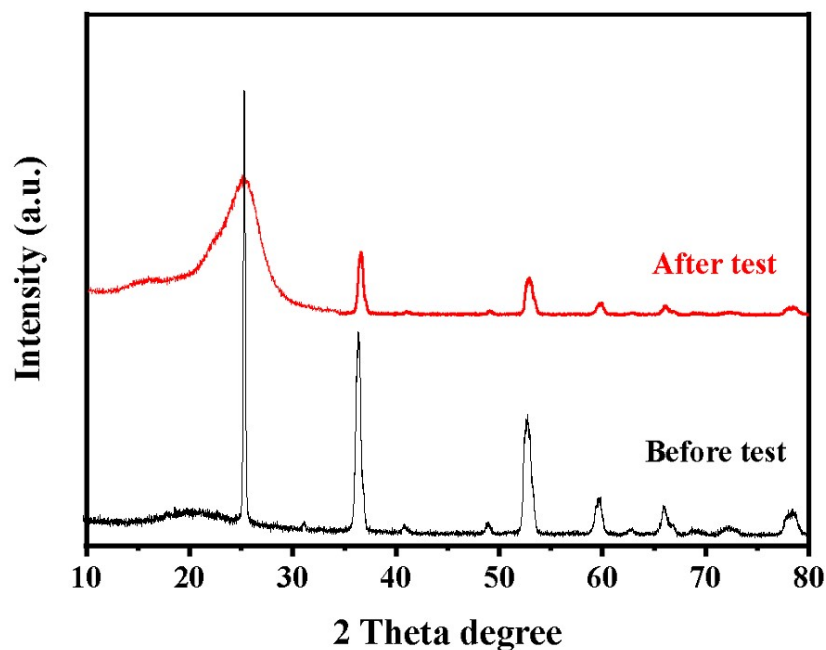

**Figure S11.** XRD patterns for the  $\text{WO}_x/\text{NPC}$ -700 °C catalyst before and after the eNRR test.

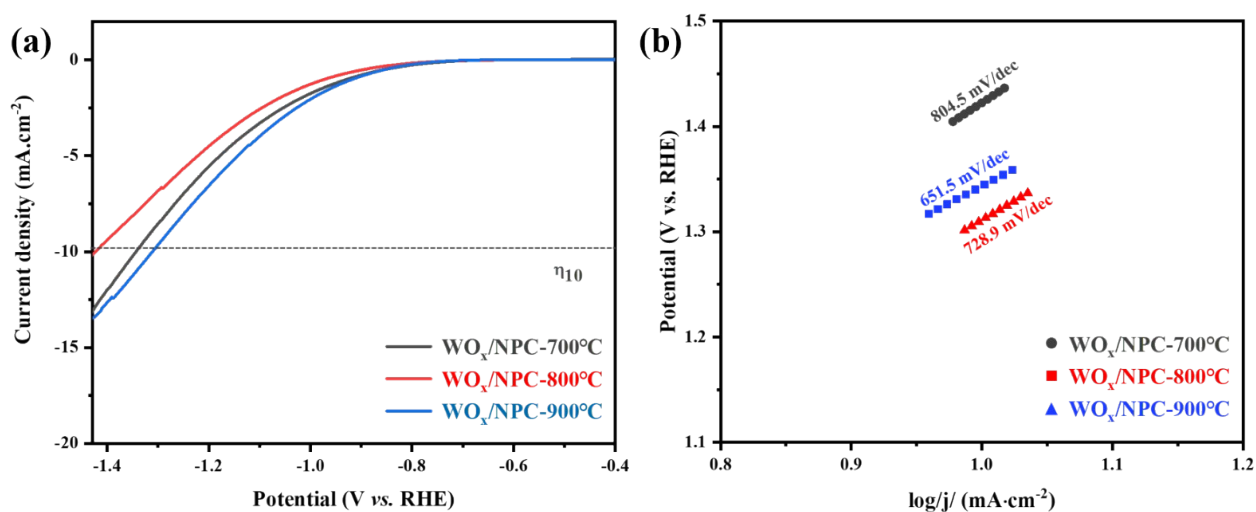

**Figure S12.** (a) Comparison of polarization curves of  $\text{WO}_x/\text{NPC}$ -700 °C,  $\text{WO}_x/\text{NPC}$ -800 °C and  $\text{WO}_x/\text{NPC}$ -900 °C for HER in Ar-saturated 0.1 M  $\text{Na}_2\text{SO}_4$  electrolyte. (b) Corresponding Tafel plots derived from polarization curves.

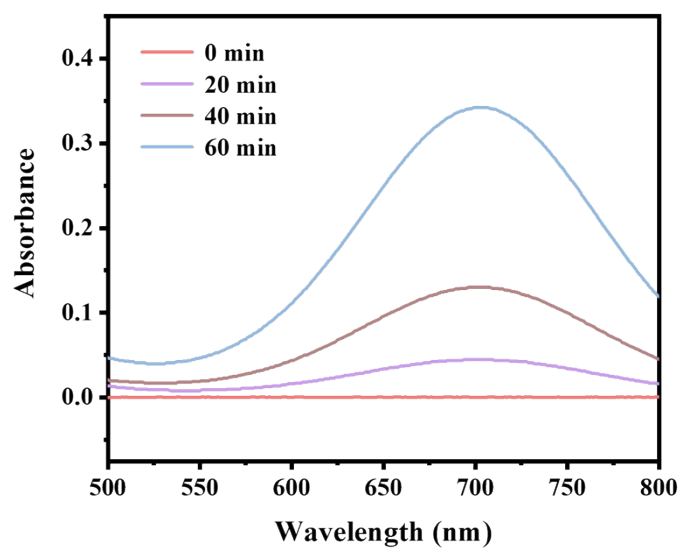

**Figure S13.** The UV-Vis absorption curves of the 0.1 M Na<sub>2</sub>SO<sub>4</sub> electrolytes stained with indophenol indicator after 0 min, 20 min, 40 min and 60 min electrolysis at -0.75 V ( vs. RHE).

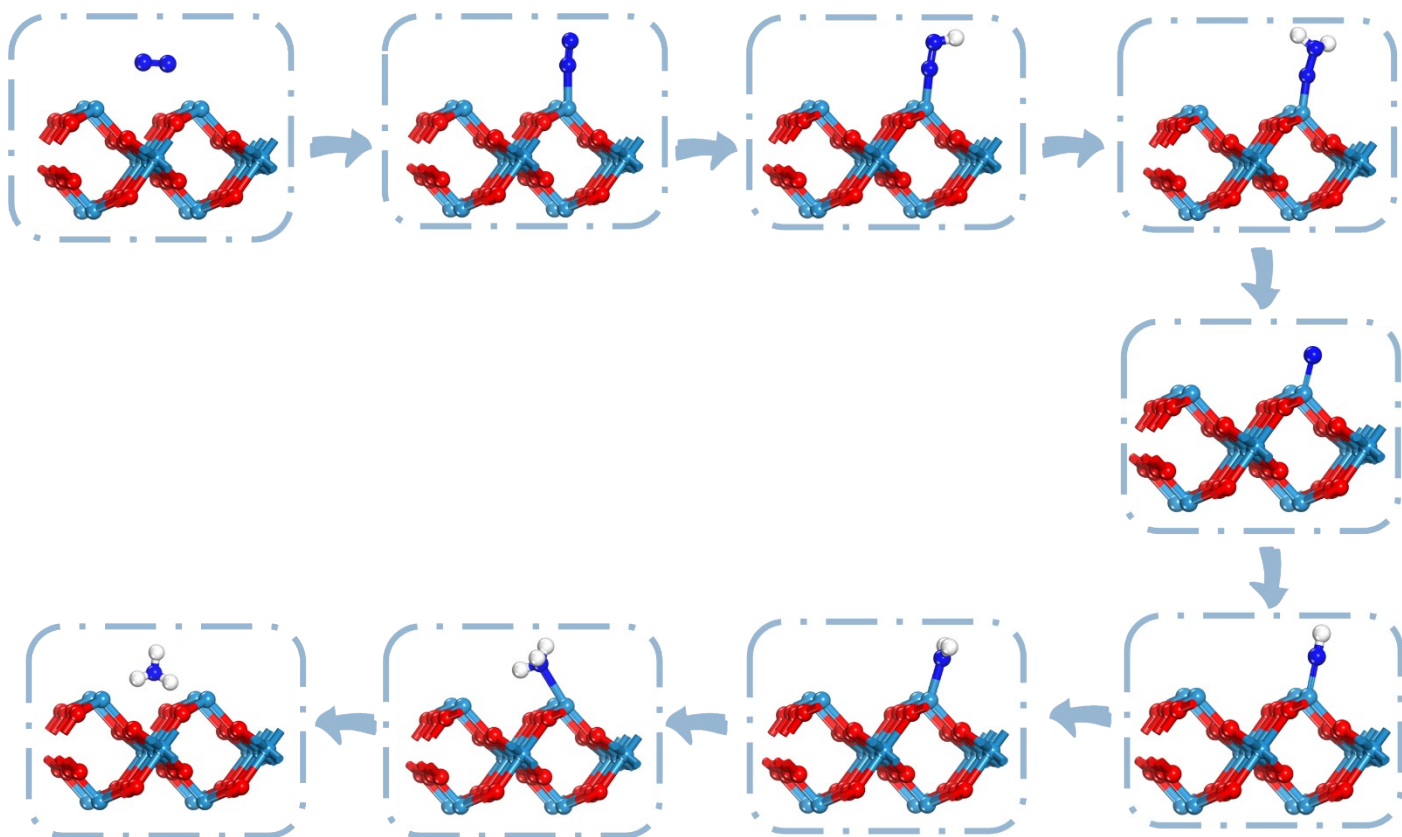

**Figure S14.** Protonation hydrogenation model of pure  $WO_2$  in nitrogen reduction process. ( red:O, blue:N, white:H and ching:W )

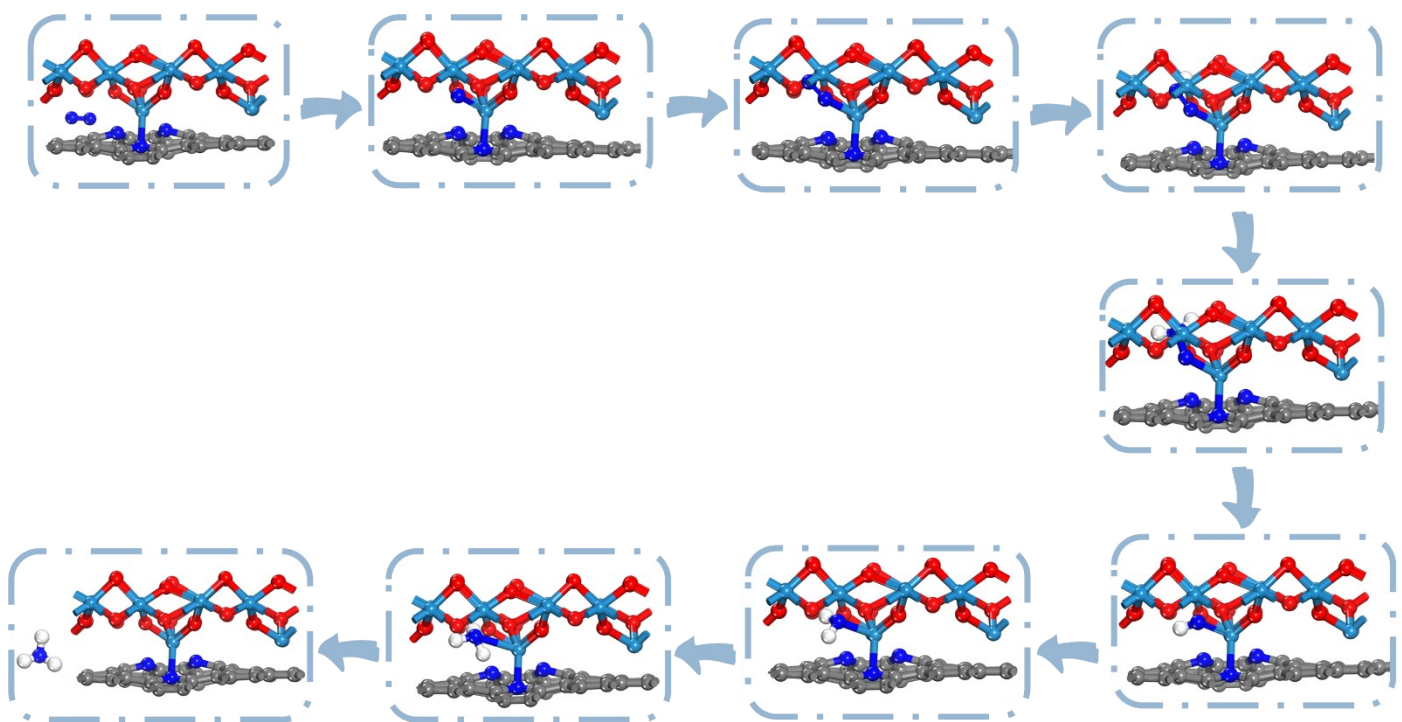

**Figure S15.** Model diagram of protonation hydrogenation of  $WO_x/NPC-700$  °C in nitrogen reduction process. ( red:O, blue:N, white:H and ching:W ).

**Table S1. Surface texture properties of WO<sub>x</sub>/NPC-T.**

| Samples                                          | WO <sub>x</sub> /NPC-700 °C | WO <sub>x</sub> /NPC-800 °C | WO <sub>x</sub> /NPC-900 °C |
|--------------------------------------------------|-----------------------------|-----------------------------|-----------------------------|
| <b>BET surface area</b><br>(m <sup>2</sup> /g)   | 150.1387                    | 75.4327                     | 22.1149                     |
| <b>Total pore volume</b><br>(cm <sup>3</sup> /g) | 0.517444                    | 0.377082                    | 0.079097                    |
| <b>Average pore Size</b><br>(nm)                 | 6.782                       | 8.196                       | 9.571                       |

**Table S2. Comparison of electrosynthesis activity of NH<sub>3</sub> catalysts at room temperature.**

| Catalyst                                  | System                                                                   | Applied potential<br>V(vs.RHE)           | Yield                                                                  | Faradic Efficiency                                       |        |
|-------------------------------------------|--------------------------------------------------------------------------|------------------------------------------|------------------------------------------------------------------------|----------------------------------------------------------|--------|
| <b>WO<sub>x</sub>/NPC<br/>(This work)</b> | <b>0.05 M<br/>Na<sub>2</sub>SO<sub>4</sub></b>                           | <b>-0.75 V</b>                           | <b>46.8 μg h<sup>-1</sup> mg<sub>cat</sub><sup>-1</sup></b>            | <b>10.3%</b>                                             |        |
| <b>W-based<br/>NRR<br/>catalysts</b>      | W 2D layered<br>W <sub>2</sub> N <sub>3</sub><br>nanosheet. <sup>9</sup> | 0.10 M<br>KOH                            | 11.66<br>±0.98 μg h <sup>-1</sup> mg <sub>cat</sub> <sup>-1</sup><br>1 | 11.67% ± 0.93                                            |        |
|                                           | Heterogeneous<br>WS <sub>2</sub> /WO <sub>2</sub> . <sup>10</sup>        | 0.05 M<br>H <sub>2</sub> SO <sub>4</sub> | -0.1 V                                                                 | 8.53 μg h <sup>-1</sup> mg <sub>cat</sub> <sup>-1</sup>  | 13.5%  |
|                                           | W-NO/NC. <sup>11</sup>                                                   | 0.5 M<br>LiClO <sub>4</sub>              | -0.7 V                                                                 | 12.62 μg h <sup>-1</sup> mg <sub>cat</sub> <sup>-1</sup> | 8.35%  |
|                                           | WO <sub>3-x</sub><br>nanosheets. <sup>12</sup>                           | 0.1 M<br>HCl                             | -0.3 V                                                                 | 17.28 μg h <sup>-1</sup> mg <sub>cat</sub> <sup>-1</sup> | 7.0%   |
| <b>N-Doped<br/>NRR<br/>catalysts</b>      | N-Doped Porous<br>Carbon. <sup>13</sup>                                  | 0.05 M<br>H <sub>2</sub> SO <sub>4</sub> | -0.9 V                                                                 | 1.40 mmol g <sup>-1</sup> h <sup>-1</sup>                | 1.42%  |
|                                           | Mo <sub>2</sub> C/NC. <sup>14</sup>                                      | 0.1 M<br>Na <sub>2</sub> SO <sub>4</sub> | -0.2 V                                                                 | 70.6 mmol h <sup>-1</sup> g <sub>cat</sub> <sup>-1</sup> | 12.3%  |
|                                           | Mo/BCN. <sup>15</sup>                                                    | 0.10 M<br>KOH                            | -0.4 V                                                                 | 37.67 μg h <sup>-1</sup> mg <sub>cat</sub> <sup>-1</sup> | 13.27% |

**Table S3. Zero point energy and entropy contributions to the free energy of gas phase and adsorbed**

species at 298.15 K for the WO<sub>2</sub> (011) (in eV).

| WO <sub>2</sub> (011) | TS        | ZPE  |
|-----------------------|-----------|------|
| N <sub>2</sub>        | 2E-03     | 0.91 |
| H <sub>2</sub>        | 1.36E-03  | 0.27 |
| NH <sub>3</sub>       | 2E-03     | 0.15 |
| *N <sub>2</sub>       | -5.17E-03 | 2.08 |
| *NNH                  | -3.07E-03 | 2.23 |
| *NNH <sub>2</sub>     | -1.85E-04 | 2.44 |
| *NNH <sub>3</sub>     | -2.00E-05 | 2.78 |
| *N                    | -2.97E-03 | 2.14 |
| *NH                   | -1.89E-03 | 2.33 |
| *NH <sub>2</sub>      | -2.70E-05 | 2.64 |
| *NH <sub>3</sub>      | -8.44E-09 | 3.05 |

**Table S4.** Zero point energy and entropy contributions to the free energy of gas phase and adsorbed species at 298.15 K for WO<sub>2</sub>/NPC (011) (in eV).

| WO <sub>2</sub> /NPC (011) | TS        | ZPE   |
|----------------------------|-----------|-------|
| N <sub>2</sub>             | 2E-03     | 0.91  |
| H <sub>2</sub>             | 1.36E-03  | 0.27  |
| NH <sub>3</sub>            | 2E-03     | 0.15  |
| *N <sub>2</sub>            | -2.57E-05 | 9.20  |
| *NNH                       | -2.58E-05 | 9.42  |
| *NNH <sub>2</sub>          | -1.61E-05 | 9.75  |
| *NNH <sub>3</sub>          | -7.58E-06 | 10.09 |
| *N                         | -2.58E-05 | 9.29  |
| *NH                        | -1.61E-05 | 9.57  |
| *NH <sub>2</sub>           | -7.57E-06 | 9.92  |
| *NH <sub>3</sub>           | -5.27E-08 | 10.17 |

## Notes and references

1. Y. Wan, Z. Wang, J. Li and R. Lv, *ACS Nano*, 2022, **16**, 643-654.
2. Y. Gu, B. Xi, W. Tian, H. Zhang, Q. Fu and S. Xiong, *Adv Mater*, 2021, **33**, e2100429.
3. .
4. Y. Zhao, F. Li, W. Li, Y. Li, C. Liu, Z. Zhao, Y. Shan, Y. Ji and L. Sun, *Angew Chem Int Ed Engl*, 2021, **60**, 20331-20341.
5. M. I. Ahmed, C. Liu, Y. Zhao, W. Ren, X. Chen, S. Chen and C. Zhao, *Angew Chem Int Ed Engl*, 2020, **59**, 21465-21469.
6. Y. Fu, T. Li, G. Zhou, J. Guo, Y. Ao, Y. Hu, J. Shen, L. Liu and X. Wu, *Nano Lett*, 2020, **20**, 4960-4967.
7. A. Liu, M. Gao, Y. Gao, X. Ren, Y. Yang, Q. Yang, Y. Li, L. Gao, X. Liang and T. Ma, *Inorganic Chemistry Communications*, 2020, **120**.
8. K. Qian, L. Du, X. Zhu, S. Liang, S. Chen, H. Kobayashi, X. Yan, M. Xu, Y. Dai and R. Li, *Journal of Materials Chemistry A*, 2019, **7**, 14592-14601.
9. H. Jin, L. Li, X. Liu, C. Tang, W. Xu, S. Chen, L. Song, Y. Zheng and S. Z. Qiao, *Adv Mater*, 2019, **31**, e1902709.
10. Y. Ling, F. M. D. Kazim, S. Ma, Q. Zhang, K. Qu, Y. Wang, S. Xiao, W. Cai and Z. Yang, *Journal of Materials Chemistry A*, 2020, **8**, 12996-13003.
11. Y. Gu, B. Xi, W. Tian, H. Zhang, Q. Fu and S. Xiong, *Advanced Materials*, 2021, **33**, 2100429.
12. L. Luo, B. Wang, J. Wang and X. Niu, *Phys Chem Chem Phys*, 2021, **23**, 16658-16663.
13. Y. Liu, Y. Su, X. Quan, X. Fan, S. Chen, H. Yu, H. Zhao, Y. Zhang and J. Zhao, *ACS Catalysis*, 2018, **8**, 1186-1191.
14. Y. Zhang, J. Hu, C. Zhang, A. T. F. Cheung, Y. Zhang, L. Liu and M. K. H. Leung, *International Journal of Hydrogen Energy*, 2021, **46**, 13011-13019.
15. L. Shi, S. Bi, Y. Qi, R. He, K. Ren, L. Zheng, J. Wang, G. Ning and J. Ye, *ACS Catalysis*, 2022, **12**, 7655-7663.
